# Supplementary material for: Conductive carbonaceous membranes: recent progress and future opportunities
Source: Royal Society of Chemistry journal article supplement (doi:10.1039/d0ta08928a), 2020-11-25
Supplement: d0ta08928a1.pdf [file d0ta08928a1.pdf]

## Supplementary Information

# Conductive carbonaceous membranes: recent progress and future opportunities

Jatin Patil,<sup>a†</sup> Asmita Jana,<sup>a†</sup> Bezawit A. Getachew,<sup>a</sup> David S. Bergsman,<sup>a</sup> Zachary Gariepy,<sup>ab</sup>  
Brendan D. Smith,<sup>a</sup> Zhengmao Lu,<sup>a</sup> **Jeffrey C. Grossman**<sup>a\*</sup>

a. Department of Materials Science and Engineering, Massachusetts Institute of Technology, 77  
Massachusetts Avenue, Cambridge, Massachusetts 02139 USA

b. Department of Chemical Engineering, University of Waterloo, 200 University Ave W,  
Waterloo, Ontario N2L 3G1, Canada

† These authors contributed equally.

\* Email: [jcg@mit.edu](mailto:jcg@mit.edu)

## Variables for cost analysis

Performance Improvement Ratio (PIR): The rate at which fouling is delayed in membranes. This is practically the ratio between the operation time before the membrane needs cleaning with electrification, to the operation time before cleaning without electrification. A high PIR would result in reduction of fouling chemicals used, as well as higher membrane lifetime.

Percent higher energy requirement: The percent higher energy consumption due to electrical energy consumed by the membrane, assuming a total energy consumption of 10 kWh m<sup>-3</sup> of water in the process without electrification. This does not consider the energy savings that may result from membrane electrification.

Percent higher cost for membrane: The increase in cost resulting from additional materials and processing complexity associated with making the membrane conductive. This is a percentage of the existing cost of the membrane.

## Formulas for cost analysis

All formulas in this section solve for the change in annual costs from the costs calculated by Hafez and El-Manharawy based on the Investor Purchase model.<sup>1</sup> The formulas are categorized by OpEx (operational expenses) and CapEx (capital expenses). The electrolyzer cost<sup>2</sup> and estimated PIR<sup>3</sup> are based on previous reports. An example of a cost-savings calculation is shown in **Table S1**.

### Increase in footprint (OpEx)

$$\Delta cost[\$] = (infrastructure)[\$] \cdot 10\%$$

### Pre-treatment chemicals costs (OpEx)

$$\Delta cost[\$] = - (pretreatment)[\$] \cdot \left(1 - \frac{1}{PIR}\right)$$

### RO Replacement membrane costs (OpEx)

$$\Delta cost[\$] = (membrane\ cost)[\$] \cdot \left( (1 + material\ cost[\%]) \cdot \left(\frac{1}{PIR}\right) - 1 \right)$$

### Post-treatment chemicals costs (OpEx)

$$\Delta cost[\$] = - (posttreatment)[\$] \cdot \left(1 - \frac{1}{PIR}\right)$$

### Electrical energy consumption cost (OpEx)

$$\Delta cost[\$] = (energy\ cost)[\$] \cdot (energy\ consumption[\%])$$

### Electrolyzer depreciation (CapEx)

$$\Delta cost[\$] = \frac{capital\ cost[\$]}{electrolyzer\ lifetime}$$

**Table S1.** Analysis of cost change from a theoretical electrified membrane setup in a model reverse-osmosis desalination plant in Egypt. Costs are adjusted for inflation from previous reports. Red text (positive values)

represent an increase in annual cost, while green text (negative values) represent a decrease in cost. The values in the table correspond to an example case where PIR = 3, % higher energy requirement = 5%, and % higher membrane cost = 7%.

| <b>ANNUAL DEPRECIATION</b>                                   |                         |                                                  |                                                   |                                                               |                                                                |
|--------------------------------------------------------------|-------------------------|--------------------------------------------------|---------------------------------------------------|---------------------------------------------------------------|----------------------------------------------------------------|
| <b>Cost detail</b>                                           | <b>Lifetime (years)</b> | <b>Cost for 250 m<sup>3</sup>/day (2020 USD)</b> | <b>Cost for 4800 m<sup>3</sup>/day (2020 USD)</b> | <b>Cost change for 250 m<sup>3</sup>/day plant (2020 USD)</b> | <b>Cost change for 4800 m<sup>3</sup>/day plant (2020 USD)</b> |
| Intake system                                                | 10                      | 26291                                            | 212677                                            |                                                               |                                                                |
| Pretreatment phase                                           | 10                      | 6947                                             | 112558                                            |                                                               |                                                                |
| RO desal phase                                               | 10                      | 17764                                            | 235608                                            |                                                               |                                                                |
| Post-treatment                                               | 10                      | 395                                              | 954                                               |                                                               |                                                                |
| Brine disposal                                               | 10                      | 3079                                             | 42881                                             |                                                               |                                                                |
| Infrastructure                                               | 40                      | 5151                                             | 71780                                             | 515                                                           | 7178                                                           |
| Professional and financing                                   | 10                      | 3868                                             | 62001                                             |                                                               |                                                                |
| <b>ANNUAL OPERATIONS / MAINTENANCE COST</b>                  |                         |                                                  |                                                   |                                                               |                                                                |
| Pretreatment chemicals                                       |                         | 5905                                             | 56852                                             | -3937                                                         | -37901                                                         |
| RO replacement membranes                                     |                         | 31595                                            | 304155                                            | -20326                                                        | -195673                                                        |
| Post treatment chemicals                                     |                         | 12113                                            | 116545                                            | -8075                                                         | -77697                                                         |
| Brine disposal                                               |                         | 4724                                             | 45481                                             |                                                               |                                                                |
| Cost of power                                                |                         | 124901                                           | 1202407                                           | 6245                                                          | 60120                                                          |
| Cost of repair and replacement                               |                         | 64753                                            | 447295                                            |                                                               |                                                                |
| Cost of labor                                                |                         | 27502                                            | 189980                                            |                                                               |                                                                |
| Cost of insurance                                            |                         | 23789                                            | 164328                                            |                                                               |                                                                |
| <b>ADDITIONAL DEPRECIATION</b>                               |                         |                                                  |                                                   |                                                               |                                                                |
| Electrolyzer                                                 | 20                      | 2337                                             | 39803                                             | 2337                                                          | 39803                                                          |
| <b>Total Annual Costs</b>                                    |                         | <b>361115</b>                                    | <b>3305306</b>                                    |                                                               |                                                                |
| <b>Annual Cost Savings</b>                                   |                         | <b>23241</b>                                     | <b>204170</b>                                     |                                                               |                                                                |
| <b>Annual % Savings</b>                                      |                         | <b>6.4%</b>                                      | <b>6.2%</b>                                       |                                                               |                                                                |
| <b>Estimated Payback Time for Electrical Capital (years)</b> |                         | <b>1.70</b>                                      | <b>3.29</b>                                       |                                                               |                                                                |

## References

- 1 A. Hafez and S. El-Manharawy, *Desalination*, 2003, 153, 335-347.
- 2 G. Saur, *Wind-To-Hydrogen Project: Electrolyzer Capital Cost Study*, National Renewable Energy Laboratory, Golden, Colorado, USA, 2008.
- 3 X. Zhu and D. Jassby, *Accounts of Chemical Research*, 2019, 52, 5, 1177–1186.
